# Supplementary material for: A polymorphic residue that attenuates the antiviral potential of interferon lambda 4 in hominid lineages
Source: PLoS Pathog. 2018 Oct 11;14(10):e1007307. doi: 10.1371/journal.ppat.1007307 (PMC6181419; doi:10.1371/journal.ppat.1007307)
Supplement: S3 Data — For acute values: the dataset includes gene lists and common and unique genes to each species for the complete data or for chimpanzees (all), those genes found in at least two studies to be differentially expressed (core); DAVID pathway analysis; comparison of in vivo and in vitro data from S2 Data along with numerical data of chimp-biased genes in humans and chimpanzees. Table also includes gene lists and fold-changes during chronic infection of up-regulated genes from humans and chimpanzees, how they are shared and, for the shared genes, the fold-change of expression in each species/condition, including HCV genotype, high or low ISG-induction status or chimpanzee identification number. (XLSX) [file ppat.1007307.s016.xlsx]

## Sheet: Gene Lists all
	n = 393	n = 362		n = 62	n = 331	n = 300
	HUMAN ALL	CHIMP ALL		SHARED	HS	PT
	CXCL10	GDF15		APOL3	AKR1B10	SEPT.4		chimp all represents genes found in at least one studies, >2FC during the human/chimp overlap period (2 to 5 months)
	CXCL9	LGALS3BP		BIRC3	CCL20	ACLY
	CXCL11	MK		BST2	HKDC1	ACO1
	AKR1B10	MIF		CASP1	IL8	ACTB
	CCL20	ODF3B		CCL18	FCAMR	ADH1B
	HKDC1	ISG15		CCL5	IGHM	AGRN
	LAMP3	MX1		CCL8	HS3ST2	AK1
	CCL18	IFI27		CD2	SLAMF8	AMY2A
	IL8	SCN5A		CD3D	CCL19	ANXA6
	FCAMR	HLA-DPB1		CD52	C15orf48	APOL6
	LYZ	LGALS3		CD8A	SLAMF7	ART3
	IGHM	IGHG3 ACADM		CMPK2	SPP1	B2M
	HS3ST2	MKNK1		CXCL10	HCP5	BATF2
	SLAMF8	AK1		CXCL11	PLA2G7	BAZ2B
	OASL	RPS6KA3		CXCL9	ANKRD22	BBOX1
	CCL8	RAC1		DDX58	UNC93A	BIN1
	GBP1	CDKN1A		EPSTI1	IGLV1-44	BTN3A1
	HLA-DPA1	IFI44		EZR	FABP5	BTN3A2
	CCL19	S100A10		FAM26F	CYP2B7P	C1QB
	STAT1	MATR3		GBP1	TRBC1	CALR
	C15orf48	ACTB		GBP2	MLIP	CALU
	SLAMF7	COL4A2		GBP5	DHRS9	CBFB
	SPP1	PLS3		GPNMB	CCL2	CBLC
	CCL5	TRBV20OR9-2		GZMA	FCGR1B	CCDC109B
	HCP5	FKBP1A		HLA-DMB	RARRES1	CCNB2
	PLA2G7	SRGN		HLA-DPA1	CAPG	CCT8
	CD8A	GZMM		HLA-DQB1	ID01	CD38
	ANKRD22	CYBA		HLA-DRA	CCL4	CD59
	GPNMB	MRC1		HLA-F	GPR171	CD5L
	UNC93A	LCN2		HMMR	CDC42	CD74
	IGLV1-44	LCN		HOPX	KCNB1	CD8B1
	FABP5	LYZ		IFNG	UBXN10	CDC3D
	ISG20	IL6R		ISG15	CENPU	CDKN1A
	CYP2B7P	ELANE		ISG20	DNAJC3	CFAP45
	TRBC1	FGFR3		ITK	BCL2A1	CGGBP1
	MLIP	PSMB10		ITM2A	ZYG11B	CHI3L1
	DHRS9	PSMA2		KLRB1	RAD21	CKS2
	CCL2	CALR		KLRK1	2001-03-01	CLIC1
	BIRC3	PSMA6		LAMP3	LCK	CLTB
	IFNG	CD59		LGALS3	TFRC	CMTR1
	RRM2	PTMA		LYZ	MCM6	CNP
	CD2	TNFRSF1A		MDK	RMI2	COL4A2
	FCGR1B	TMSB10		NT5C3	CHEK2	COX5B
	RARRES1	TNFSF10		NUSAP1	DNAJB14	COX7A2
	ITM2A	FAS		OAS2	GBP4	CREM
	CAPG	UCP2		OASL	PRPF6	CRYM
	ITK	PROX1		PLA2G4C	SPEN	CSF2RA
	PSMB9	YY1		PSMB9	TBC1D5	CSNK1A1
	ID01	NEUROG1		PTPRC	CDK6	CYB561
	CCL4	RB1		RAC2	TAGAP	CYBA
	GPR171	RPA3		RRM2	FPR3	DDX1
	CDC42	IFIT1		SCD	TLR8	DDX60
	KCNB1	AGRN		SLC23A2	CXCR6	DDX60L
	UBXN10	RSAD2		STAT1	MICB	DHX58
	CENPU	STAT1		TAP1	APOBEC3G	DSS1
	DNAJC3	HIST1H2BD		TAP2	TRAC	DTX3L
	BCL2A1	TRIM14		TDO2	IL18BP	DUSP1
	CD3D	IFI6		TYMS	USP31	DYNLT1
	ZYG11B	OAS1		UCP2	GPR18	EEF2
	HLA-DQB1	CMTR1		UGCG	ONECUT2	EIF2AK2
	RAD21	IFITM1		WARS	FN1	EIF2AK3
	2001-03-01	SP100		XAF1	SAMSN1	ELANE
	EPSTI1	IFI44L			ZWINT	ELF4
	APOL3	OASL			ELF1	ENPP2
	LGALS3	IFIT3			HPSE	EST
	LCK	ESTs			LGALS8	ESTs
	TFRC	TRIM22			MYC	EVI2A
	MCM6	OAS2			TRIM69	FAM46A
	MDK	DYNLT1			IL1B	FAS
	RMI2	UBE2L6			IL2RG	FGFR3
	CHEK2	LY6E			BCAT1	FKBP1A
	DNAJB14	TDO2			CCL21	FLOT2
	GBP4	HIST1H2BM			CXCR4	FMO1
	PRPF6	EST			PKM	FMR1
	SPEN	HLA-DRA			PLXNA1	FOSB
	TBC1D5	MIG			FAM129A	GABBR1
	CDK6	GZMA			MBNL1	GAS2
	TAGAP	HLA-DRB1			SEL1L	GCA
	FPR3	HLA-DMA			LSP1	GDF15
	TLR8	HLA-DPA1			ME1	GNG3
	CXCR6	CCL5			RASGRP1	GPR88
	MICB	TCRB			TREM2	GZMM
	APOBEC3G	PTPRC			CD83	HERC5
	TRAC	LCP1			F13A1	HERC6
	IL18BP	C1QB			TSKU	HIST1H2BD
	USP31	CD5L			CD86	HIST1H2BM
	HLA-DMB	CD8A			CLIP4	HIST1H4H
	HOPX	IL10RA			JAK1	HLA-A
	ISG15	GBP2			UBA6	HLA-B
	GPR18	IGLJ3			ALDH1B1	HLA-C
	ONECUT2	CLIC1			IGSF6	HLA-DMA
	TAP2	HLA-DQB1			IL32	HLA-DOB
	FN1	ITGB2			KRT222	HLA-DPB1
	SAMSN1	WARS			PTTG1	HLA-DQA1
	ZWINT	TYROBP			CSF2RB	HLA-DRB1
	ELF1	BTN3A2			TIGAR	HLA-DRB3
	HPSE	HLA-A			CYBB	HLA-DRB4
	GZMA	HLA-G			PIR	HLA-DRB5
	LGALS8	PSME2			SLC7A1	HLA-DRB6
	CD52	PSMB8			GINS2	HLA-E
	GBP5	LMP2			BRD4	HLA-G
	MYC	TAP1			CD72	HLA-J
	SCD	SNRK			MTHFD2	HMGB2
	TRIM69	NT5E			TAPBPL	HMGCS1
	IL1B	CKS2			PILRA	HOXB5
	IL2RG	ART3			BTN3A3	HPD
	TAP1	KDM5A			SCD5	ID2
	BCAT1	CREM			PLXNC1	IFI16
	CCL21	ENPP2			AGXT2L1	IFI27
	CXCR4	CGGBP1			MIB1	IFI30
	PKM	COX7A2			TNFAIP3	IFI35
	PLXNA1	XCL2			CASC5	IFI44
	FAM129A	DDX1			CDC2	IFI44L
	FAM26F	PRRC1			PKP4	IFI6
	MBNL1	SLC2A2			VPS35	IFIH1
	SEL1L	PSMA3			HSP90B1	IFIT1
	LSP1	RARS			FOXP1	IFIT2
	ME1	PPP2R2A			MNDA	IFIT3
	RASGRP1	ACLY			AIFM2	IFIT5
	TREM2	PSMD10			EVOL2	IFITM1
	CD83	CCT8			C12orf75	IGHG3
	F13A1	CSNK1A1			CD53	IGHG3 ACADM
	PTPRC	BIN1			MSR1	IGL
	TSKU	LEPR			PALLD	IGLJ3
	CD86	LIPA			STK17A	IL10RA
	OAS2	XRCC5			IGL@	IL6R
	CLIP4	PRKACB			PTGER4	IRF1
	JAK1	UGCG			CARD16	IRF7
	UBA6	LY96			FCGR2A	ITGB2
	UCP2	GAS2			GPR37	ITSN2
	ALDH1B1	CBFB			MCM5	JUN
	IGSF6	CALU			MFSD6	KCNMA1
	IL32	BBOX1			SERPINB9	KDM5A
	KRT222	CLTB			FYB	KIAA0970
	PLA2G4C	KIAA0970			PTPRCAP	KIAA1033
	PTTG1	BAZ2B			SLC1A3	KIF20A
	CSF2RB	XPO1			CCR5	KIF22
	GBP2	FMR1			CD44	LAP3
	TIGAR	KIAA1033			DCK	LCN
	CYBB	ZFC3H1			LCP2	LCN2
	PIR	NAB1			TACC1	LCP1
	SLC7A1	QKI			TMEM260	LEPR
	EZR	TSPAN8			CD48	LGALS1
	GINS2	ITSN2			GM2A	LGALS3BP
	KLRB1	RGS10			SAMHD1	LIPA
	KLRK1	CYB561			XCL1	LIPC
	BRD4	TM7SF2			FCER1G	LMP2
	CASP1	FLOT2			MCM2	LOC100133583.L
	CD72	RDH5			TAPBP	LOC100133678
	HMMR	QRICH1			NEDD9	LOC100290966
	MTHFD2	LIPC			ANXA2	LOC100294036
	TAPBPL	PPARA			FBXO6	LOC100294114
	UGCG	PIM1			ANKRD29	LOC100294162
	PILRA	SEPT4			ME2	LOC100294190
	WARS	OAS3			RFX5	LOC100294224
	BTN3A3	B2M			BTG3	LOC100294276
	CMPK2	TIA1			DRAM1	LOC100294277
	SCD5	FOSB			EHD4	LOC100294317
	PLXNC1	JUN			LILRA3	LOC100294468
	AGXT2L1	PRNP			GNAQ	LOC731682
	MIB1	ID2			LOC553137	LTB
	TNFAIP3	TOB2			GNMT	LY6E
	CASC5	PRSS21			CYP26A1	LY96
	CDC2	CDC3D			LARP1B	MAGI1
	HLA-F	IGL			IGFBP2	MALAT1
	PKP4	CD8B1			RUSC1-AS1	MATR3
	RAC2	TRA			GATM	MBL1P
	VPS35	CSF2RA			NNMT	MELK
	HSP90B1	KLRB1			PPP1R3C	MFSD2A
	FOXP1	IGHG3			EEF1D	MIF
	MNDA	CD2			NDRG2	MIG
	AIFM2	TRGV9			SSU72	MK
	HLA-DRA	ITK			ALDOB	MKNK1
	EVOL2	SELPLG			CYP2C9	MLLT11
	C12orf75	EZR			ARG1	MRC1
	CD53	RI58			PDK4	MX1
	MSR1	IFNG			ZNF207	NAB1
	PALLD	TANK			ANKRD10	NAT8
	STK17A	PAD14			PZP	NCOA7
	TYMS	SFTPA2			MRPS15	NDC80
	IGL@	UBD			UPB1	NEUROG1
	PTGER4	HOXB5			NR1I3	NLRC5
	CARD16	MLLT11			SELE	NMI
	FCGR2A	ITM2A			CES4	NOS1AP
	GPR37	ANXA6			APOH	NT5E
	MCM5	SFRS3			ADH4	OAS1
	MFSD6	AMY2A			IGFBP5	OAS3
	SERPINB9	KIF22			VIL1	OAT
	FYB	NOS1AP			AIG1	ODF3B
	PTPRCAP	COX5B			EMC7	OPTN
	SLC1A3	LGALS1			NUCKS1	PAD14
	CCR5	MBL1P			PARL	PARP10
	CD44	GNG3			FTX	PARP12
	DCK	RBBP4			NUDCD2	PARP14
	DDX58	CHI3L1			PPP2R1B	PARP9
	LCP2	CFAP45			CAMK2N1	PBK
	NT5C3	CBLC			HNMT	PCAF
	TACC1	SLCO1B1			SLC6A16	PEG10
	TMEM260	DSS1			LYRM5	PIGR
	CD48	MAGI1			HBB	PIM1
	GM2A	PCAF			BCO2	PLAC8
	SAMHD1	EIF2AK3			RBP4	PLN
	XCL1	ACO1			TAT	PLS3
	FCER1G	ADH1B			KCNAB1	PLSCR1
	MCM2	APOL3			PGK1	PNPT1
	TAPBP	APOL6			PLGLB2	PPARA
	NEDD9	BATF2			HECTD1	PPM1K
	ANXA2	BIRC3			SLC3A1	PPP1R2P1
	FBXO6	BST2			FABP1	PPP2R2A
	NUSAP1	BTN3A1			DHRS7	PRKACB
	ANKRD29	CASP1			RPAIN	PRNP
	ME2	CCDC109B			VDAC3	PRODH
	RFX5	CCL18			LOC100292682	PROX1
	BTG3	CCL8			SLC22A7	PRRC1
	DRAM1	CCNB2			AMBP	PRSS2
	EHD4	CD38			PC	PRSS21
	LILRA3	CD3D			CYP2C8	PSMA2
	GNAQ	CD52			GANAB	PSMA3
	LOC553137	CD74			FUS	PSMA6
	GNMT	CMPK2			MT1M	PSMB10
	CYP26A1	CNP			METTL7A	PSMB8
	LARP1B	CRYM			ITCH	PSMD10
	IGFBP2	CXCL10			FAM134C	PSME2
	RUSC1-AS1	CXCL11			NIPAL1	PTMA
	GATM	CXCL9			PNPLA3	QKI
	NNMT	DDX58			ZIC1	QRICH1
	PPP1R3C	DDX60			FETUB	RAC1
	EEF1D	DDX60L			N4BP2L2	RARRES3
	NDRG2	DHX58			ANGPTL3	RARS
	SSU72	DTX3L			NREP	RB1
	ALDOB	DUSP1			DIRAS3	RBBP4
	CYP2C9	EEF2			CMTM6	RDH5
	ARG1	EIF2AK2			SPAG9	RGS10
	PDK4	ELF4			UBE2K	RI58
	ZNF207	EPSTI1			STK16	RNF213
	ANKRD10	EVI2A			C19orf43	RP9
	PZP	FAM26F			RHEB	RPA3
	MRPS15	FAM46A			NEAT1	RPS6KA3
	UPB1	FMO1			ABP1	RSAD2
	NR1I3	GABBR1			GAS6-AS1	RTP4
	SELE	GBP1			PNN	S100A10
	CES4	GBP5			RMND5A	SAMD9
	APOH	GCA			CYP4A11	SAMD9L
	ADH4	GPNMB			RPL14	SCN5A
	IGFBP5	GPR88			CHURC1	SELPLG
	VIL1	HERC5			SLC16A10	SEMA4D
	AIG1	HERC6			LOC100293390	SFRS3
	EMC7	HIST1H4H			TRA2A	SFTPA2
	NUCKS1	HLA-B			ERP29	SHISA5
	PARL	HLA-C			SORL1	SLC15A3
	FTX	HLA-E			PACSIN3	SLC16A1
	NUDCD2	HLA-F			RPL27A	SLC2A2
	PPP2R1B	HLA-J			CIRBP	SLCO1B1
	CAMK2N1	HLA-DMB			PTPRF	SNHG8
	HNMT	HLA-DOB			PSD3	SNRK
	SLC6A16	HLA-DQA1			BHMT	SOD2
	LYRM5	HLA-DRB3			RPS11	SP100
	SLC23A2	HLA-DRB4			DDX6	SP110
	HBB	HLA-DRB5			CYP2E1	SP140
	BCO2	HLA-DRB6			LPA	SP140L
	RBP4	HMGB2			CFHR3	SQLE
	TAT	HMGCS1			PABPC1L	SRGN
	KCNAB1	HMMR			SULT1E1	STMN1
	PGK1	HOPX			SRSF4	TANK
	PLGLB2	HPD			C1orf21	TCRB
	HECTD1	IFI16			SLC25A37	TDRD7
	SLC3A1	IFI30			TF	TFPI2
	FABP1	IFI35			SRSF5	TIA1
	DHRS7	IFIH1			YIPF4	TM7SF2
	RPAIN	IFIT2			RAPH1	TMEM140
	VDAC3	IFIT5			ARNTL	TMSB10
	LOC100292682	IRF1			ATP6V0E1	TNFRSF1A
	SLC22A7	IRF7			H19	TNFSF10
	AMBP	ISG20			TFG	TOB2
	PC	KCNMA1			MRPL41	TOP2A
	CYP2C8	KIF20A			RORC	TRA
	GANAB	KLRK1			CAPN3	TRA@
	FUS	LAMP3			ENOSF1	TRAJ17
	MT1M	LAP3			ANKRD12	TRAV20
	METTL7A	LOC100133583.L			ADRA1A	TRBV20OR9-2
	ITCH	LOC100133678			PSMA3-AS1	TRGV9
	FAM134C	LOC100290966			FKBP2	TRIM14
	NIPAL1	LOC100294036			DCAF11	TRIM22
	PNPLA3	LOC100294114			CFHR4	TRIM24
	ZIC1	LOC100294162			ZDHHC11	TRIM5
	FETUB	LOC100294190			KANK4	TSPAN8
	N4BP2L2	LOC100294224			PRR11	TYMP
	TDO2	LOC100294276			HPS3	TYROBP
	ANGPTL3	LOC100294277			PMVK	UBD
	NREP	LOC100294317			NEURL1B	UBE2L6
	DIRAS3	LOC100294468			MOCOS	UPP2
	CMTM6	LOC731682			GIPC2	VASH2
	SPAG9	LTB			RGN	XCL2
	UBE2K	MALAT1			CFHR5	XPO1
	XAF1	MDK			SRRM2	XRCC5
	STK16	MELK			AQP3	YY1
	C19orf43	MFSD2A			CNGA1	ZBP1
	RHEB	NAT8			TMEM178	ZFC3H1
	NEAT1	NCOA7			ABLIM3	ZNF493
	ABP1	NDC80			LONRF3	ZNFX1
	PNN	NMI			SLC40A1
	RMND5A	NT5C3			PDE11A
	CYP4A11	NUSAP1			ECHDC2
	RPL14	OAT			BRD1
	CHURC1	OPTN			ZKSCAN1
	SLC16A10	PARP10			AASS
	LOC100293390	PARP12			ZNF652
	TRA2A	PARP14			ATRN
	ERP29	PARP9			FBXW12
	SORL1	PBK			HOOK1
	PACSIN3	PEG10			MSL1
	RPL27A	PIGR			TMEM70
	CIRBP	PLA2G4C			C11orf1
	PTPRF	PLAC8			RETSAT
	PSD3	PLN			MACF1
	BHMT	PLSCR1			TTC36
	RPS11	PNPT1			NR1I2
	DDX6	PPM1K			ACOX1
	CYP2E1	PPP1R2P1			LINC01127
	LPA	PRODH			ZFYVE21
	CFHR3	PRSS2			MAVS
	PABPC1L	PSMB9			HAO2
	SULT1E1	RAC2			PCSK6
	SRSF4	RARRES3			MIR663AHG
	C1orf21	RNF213			RAB32
	BST2	RP9			UBC
	SLC25A37	RRM2			TENM1
	TF	RTP4			PLG
	SRSF5	SAMD9			MYDGF
	YIPF4	SAMD9L			BAX
	RAPH1	SCD
	ARNTL	SEMA4D
	ATP6V0E1	SHISA5
	H19	SLC15A3
	TFG	SLC16A1
	MRPL41	SLC23A2
	RORC	SNHG8
	CAPN3	SOD2
	ENOSF1	SP110
	ANKRD12	SP140
	ADRA1A	SP140L
	PSMA3-AS1	SQLE
	FKBP2	STMN1
	DCAF11	TAP2
	CFHR4	TDRD7
	ZDHHC11	TFPI2
	KANK4	TMEM140
	PRR11	TOP2A
	HPS3	TRA@
	PMVK	TRAJ17
	NEURL1B	TRAV20
	MOCOS	TRIM24
	GIPC2	TRIM5
	RGN	TYMP
	CFHR5	TYMS
	SRRM2	UPP2
	AQP3	VASH2
	CNGA1	XAF1
	TMEM178	ZBP1
	ABLIM3	ZNF493
	LONRF3	ZNFX1
	ZNF451
	SLC40A1
	PDE11A
	ECHDC2
	BRD1
	ZKSCAN1
	AASS
	ZNF652
	ATRN
	FBXW12
	HOOK1
	MSL1
	TMEM70
	C11orf1
	RETSAT
	MACF1
	TTC36
	NR1I2
	ACOX1
	LINC01127
	ZFYVE21
	MAVS
	HAO2
	PCSK6
	MIR663AHG
	RAB32
	UBC
	TENM1
	PLG
	MYDGF
	BAX

## Sheet: Gene lists core
	n=393	n=47		n=18	n=375	n=29
	HUMAN ALL	CHIMP CORE*		SHARED	HS	PT		*chimp core represents genes found in at least two independent studies, >2FC during the human/chimp overlap period (2 to 5 months)
	CXCL10	ISG15		CXCL9	CXCL10	MX1
	CXCL9	MX1		LYZ	CXCL11	IFI27
	CXCL11	IFI27		OASL	AKR1B10	LGALS3BP
	AKR1B10	LGALS3BP		HLA-DPA1	CCL20	HLA-DPB1
	CCL20	HLA-DPB1		STAT1	HKDC1	CDKN1A
	HKDC1	CDKN1A		CCL5	LAMP3	IFI44
	LAMP3	IFI44		CD8A	CCL18	IFIT1
	CCL18	IFIT1		ITM2A	IL8	IFI6
	IL8	IFI6		HLA-DQB1	FCAMR	BAZ2B
	FCAMR	OAS2		LGALS3	IGHM	PSMB10
	LYZ	GZMA		MDK	HS3ST2	PSMA6
	IGHM	CCL5		ISG15	SLAMF8	RSAD2
	HS3ST2	CD8A		GZMA	CCL8	OAS1
	SLAMF8	BAZ2B		TAP1	GBP1	IFITM1
	OASL	PSMB10		PTPRC	CCL19	IFI44L
	CCL8	PSMA6		OAS2	C15orf48	IFIT3
	GBP1	RSAD2		GBP2	SLAMF7	TRIM22
	HLA-DPA1	STAT1		HLA-DRA	SPP1	DYNLT1
	CCL19	OAS1			HCP5	UBE2L6
	STAT1	IFITM1			PLA2G7	HLA-DRB1
	C15orf48	IFI44L			ANKRD22	HLA-DMA
	SLAMF7	OASL			GPNMB	BTN3A2
	SPP1	IFIT3			UNC93A	HLA-A
	CCL5	TRIM22			IGLV1-44	HLA-G
	HCP5	DYNLT1			FABP5	PSMB8
	PLA2G7	UBE2L6			ISG20	Sept.4
	CD8A	HLA-DRA			CYP2B7P	B2M
	ANKRD22	HLA-DRB1			TRBC1	OAS3
	GPNMB	HLA-DMA			MLIP	UBD
	UNC93A	HLA-DPA1			DHRS9
	IGLV1-44	PTPRC			CCL2
	FABP5	GBP2			BIRC3
	ISG20	HLA-DQB1			IFNG
	CYP2B7P	BTN3A2			RRM2
	TRBC1	HLA-A			CD2
	MLIP	HLA-G			FCGR1B
	DHRS9	PSMB8			RARRES1
	CCL2	TAP1			CAPG
	BIRC3	2004-09-01			ITK
	IFNG	LGALS3			PSMB9
	RRM2	LYZ			ID01
	CD2	MDK			CCL4
	FCGR1B	CXCL9			GPR171
	RARRES1	B2M			CDC42
	ITM2A	ITM2A			KCNB1
	CAPG	OAS3			UBXN10
	ITK	UBD			CENPU
	PSMB9				DNAJC3
	ID01				BCL2A1
	CCL4				CD3D
	GPR171				ZYG11B
	CDC42				RAD21
	KCNB1				2001-03-01
	UBXN10				EPSTI1
	CENPU				APOL3
	DNAJC3				LCK
	BCL2A1				TFRC
	CD3D				MCM6
	ZYG11B				RMI2
	HLA-DQB1				CHEK2
	RAD21				DNAJB14
	2001-03-01				GBP4
	EPSTI1				PRPF6
	APOL3				SPEN
	LGALS3				TBC1D5
	LCK				CDK6
	TFRC				TAGAP
	MCM6				FPR3
	MDK				TLR8
	RMI2				CXCR6
	CHEK2				MICB
	DNAJB14				APOBEC3G
	GBP4				TRAC
	PRPF6				IL18BP
	SPEN				USP31
	TBC1D5				HLA-DMB
	CDK6				HOPX
	TAGAP				GPR18
	FPR3				ONECUT2
	TLR8				TAP2
	CXCR6				FN1
	MICB				SAMSN1
	APOBEC3G				ZWINT
	TRAC				ELF1
	IL18BP				HPSE
	USP31				LGALS8
	HLA-DMB				CD52
	HOPX				GBP5
	ISG15				MYC
	GPR18				SCD
	ONECUT2				TRIM69
	TAP2				IL1B
	FN1				IL2RG
	SAMSN1				BCAT1
	ZWINT				CCL21
	ELF1				CXCR4
	HPSE				PKM
	GZMA				PLXNA1
	LGALS8				FAM129A
	CD52				FAM26F
	GBP5				MBNL1
	MYC				SEL1L
	SCD				LSP1
	TRIM69				ME1
	IL1B				RASGRP1
	IL2RG				TREM2
	TAP1				CD83
	BCAT1				F13A1
	CCL21				TSKU
	CXCR4				CD86
	PKM				CLIP4
	PLXNA1				JAK1
	FAM129A				UBA6
	FAM26F				UCP2
	MBNL1				ALDH1B1
	SEL1L				IGSF6
	LSP1				IL32
	ME1				KRT222
	RASGRP1				PLA2G4C
	TREM2				PTTG1
	CD83				CSF2RB
	F13A1				TIGAR
	PTPRC				CYBB
	TSKU				PIR
	CD86				SLC7A1
	OAS2				EZR
	CLIP4				GINS2
	JAK1				KLRB1
	UBA6				KLRK1
	UCP2				BRD4
	ALDH1B1				CASP1
	IGSF6				CD72
	IL32				HMMR
	KRT222				MTHFD2
	PLA2G4C				TAPBPL
	PTTG1				UGCG
	CSF2RB				PILRA
	GBP2				WARS
	TIGAR				BTN3A3
	CYBB				CMPK2
	PIR				SCD5
	SLC7A1				PLXNC1
	EZR				AGXT2L1
	GINS2				MIB1
	KLRB1				TNFAIP3
	KLRK1				CASC5
	BRD4				CDC2
	CASP1				HLA-F
	CD72				PKP4
	HMMR				RAC2
	MTHFD2				VPS35
	TAPBPL				HSP90B1
	UGCG				FOXP1
	PILRA				MNDA
	WARS				AIFM2
	BTN3A3				EVOL2
	CMPK2				C12orf75
	SCD5				CD53
	PLXNC1				MSR1
	AGXT2L1				PALLD
	MIB1				STK17A
	TNFAIP3				TYMS
	CASC5				IGL@
	CDC2				PTGER4
	HLA-F				CARD16
	PKP4				FCGR2A
	RAC2				GPR37
	VPS35				MCM5
	HSP90B1				MFSD6
	FOXP1				SERPINB9
	MNDA				FYB
	AIFM2				PTPRCAP
	HLA-DRA				SLC1A3
	EVOL2				CCR5
	C12orf75				CD44
	CD53				DCK
	MSR1				DDX58
	PALLD				LCP2
	STK17A				NT5C3
	TYMS				TACC1
	IGLAT				TMEM260
	PTGER4				CD48
	CARD16				GM2A
	FCGR2A				SAMHD1
	GPR37				XCL1
	MCM5				FCER1G
	MFSD6				MCM2
	SERPINB9				TAPBP
	FYB				NEDD9
	PTPRCAP				ANXA2
	SLC1A3				FBXO6
	CCR5				NUSAP1
	CD44				ANKRD29
	DCK				ME2
	DDX58				RFX5
	LCP2				BTG3
	NT5C3				DRAM1
	TACC1				EHD4
	TMEM260				LILRA3
	CD48				GNAQ
	GM2A			DOWN	LOC553137
	SAMHD1				GNMT
	XCL1				CYP26A1
	FCER1G				LARP1B
	MCM2				IGFBP2
	TAPBP				RUSC1-AS1
	NEDD9				GATM
	ANXA2				NNMT
	FBXO6				PPP1R3C
	NUSAP1				EEF1D
	ANKRD29				NDRG2
	ME2				SSU72
	RFX5				ALDOB
	BTG3				CYP2C9
	DRAM1				ARG1
	EHD4				PDK4
	LILRA3				ZNF207
	GNAQ				ANKRD10
DOWN	LOC553137				PZP
	GNMT				MRPS15
	CYP26A1				UPB1
	LARP1B				NR1I3
	IGFBP2				SELE
	RUSC1-AS1				CES4
	GATM				APOH
	NNMT				ADH4
	PPP1R3C				IGFBP5
	EEF1D				VIL1
	NDRG2				AIG1
	SSU72				EMC7
	ALDOB				NUCKS1
	CYP2C9				PARL
	ARG1				FTX
	PDK4				NUDCD2
	ZNF207				PPP2R1B
	ANKRD10				CAMK2N1
	PZP				HNMT
	MRPS15				SLC6A16
	UPB1				LYRM5
	NR1I3				SLC23A2
	SELE				HBB
	CES4				BCO2
	APOH				RBP4
	ADH4				TAT
	IGFBP5				KCNAB1
	VIL1				PGK1
	AIG1				PLGLB2
	EMC7				HECTD1
	NUCKS1				SLC3A1
	PARL				FABP1
	FTX				DHRS7
	NUDCD2				RPAIN
	PPP2R1B				VDAC3
	CAMK2N1				LOC100292682
	HNMT				SLC22A7
	SLC6A16				AMBP
	LYRM5				PC
	SLC23A2				CYP2C8
	HBB				GANAB
	BCO2				FUS
	RBP4				MT1M
	TAT				METTL7A
	KCNAB1				ITCH
	PGK1				FAM134C
	PLGLB2				NIPAL1
	HECTD1				PNPLA3
	SLC3A1				ZIC1
	FABP1				FETUB
	DHRS7				N4BP2L2
	RPAIN				TDO2
	VDAC3				ANGPTL3
	LOC100292682				NREP
	SLC22A7				DIRAS3
	AMBP				CMTM6
	PC				SPAG9
	CYP2C8				UBE2K
	GANAB				XAF1
	FUS				STK16
	MT1M				C19orf43
	METTL7A				RHEB
	ITCH				NEAT1
	FAM134C				ABP1
	NIPAL1				GAS6-AS1
	PNPLA3				PNN
	ZIC1				RMND5A
	FETUB				CYP4A11
	N4BP2L2				RPL14
	TDO2				CHURC1
	ANGPTL3				SLC16A10
	NREP				LOC100293390
	DIRAS3				TRA2A
	CMTM6				ERP29
	SPAG9				SORL1
	UBE2K				PACSIN3
	XAF1				RPL27A
	STK16				CIRBP
	C19orf43				PTPRF
	RHEB				PSD3
	NEAT1				BHMT
	ABP1				RPS11
	GAS6-AS1				DDX6
	PNN				CYP2E1
	RMND5A				LPA
	CYP4A11				CFHR3
	RPL14				PABPC1L
	CHURC1				SULT1E1
	SLC16A10				SRSF4
	LOC100293390				C1orf21
	TRA2A				BST2
	ERP29				SLC25A37
	SORL1				TF
	PACSIN3				SRSF5
	RPL27A				YIPF4
	CIRBP				RAPH1
	PTPRF				ARNTL
	PSD3				ATP6V0E1
	BHMT				H19
	RPS11				TFG
	DDX6				MRPL41
	CYP2E1				RORC
	LPA				CAPN3
	CFHR3				ENOSF1
	PABPC1L				ANKRD12
	SULT1E1				ADRA1A
	SRSF4				PSMA3-AS1
	C1orf21				FKBP2
	BST2				DCAF11
	SLC25A37				CFHR4
	TF				ZDHHC11
	SRSF5				KANK4
	YIPF4				PRR11
	RAPH1				HPS3
	ARNTL				PMVK
	ATP6V0E1				NEURL1B
	H19				MOCOS
	TFG				GIPC2
	MRPL41				RGN
	RORC				CFHR5
	CAPN3				SRRM2
	ENOSF1				AQP3
	ANKRD12				CNGA1
	ADRA1A				TMEM178
	PSMA3-AS1				ABLIM3
	FKBP2				LONRF3
	DCAF11				ZNF451
	CFHR4				SLC40A1
	ZDHHC11				PDE11A
	KANK4				ECHDC2
	PRR11				BRD1
	HPS3				ZKSCAN1
	PMVK				AASS
	NEURL1B				ZNF652
	MOCOS				ATRN
	GIPC2				FBXW12
	RGN				HOOK1
	CFHR5				MSL1
	SRRM2				TMEM70
	AQP3				C11orf1
	CNGA1				RETSAT
	TMEM178				MACF1
	ABLIM3				TTC36
	LONRF3				NR1I2
	ZNF451				ACOX1
	SLC40A1				LINC01127
	PDE11A				ZFYVE21
	ECHDC2				MAVS
	BRD1				HAO2
	ZKSCAN1				PCSK6
	AASS				MIR663AHG
	ZNF652				RAB32
	ATRN				UBC
	FBXW12				TENM1
	HOOK1				PLG
	MSL1				MYDGF
	TMEM70				BAX
	C11orf1
	RETSAT
	MACF1
	TTC36
	NR1I2
	ACOX1
	LINC01127
	ZFYVE21
	MAVS
	HAO2
	PCSK6
	MIR663AHG
	RAB32
	UBC
	TENM1
	PLG
	MYDGF
	BAX

## Sheet: DAVID pathways ALL
		bioprocess clusters
		hs		pt				total defense response to viruses
		defense response to virus	4.1e-06	defense response to virus	3 E-23
		chemokine-mediated signalling pathway	1.2e-07	IFNg mediated signalling	1.7e-30			human					chimp
		IFNg mediated signalling	6.4e-06	T cell receptor signalling pathway	7.4e-11
		ag presentation and pres to MHC class 1	0.14	detection of bacterium	0.0045			OFFICIAL_GENE_SYMBOL	GENE NAME	Related Genes	Species		OFFICIAL_GENE_SYMBOL	GENE NAME	Related Genes	Species
		oxidation-reduction prcoess	0.18	negtaive regulation of type I IFN production	0.0012			OAS2	2'-5'-oligoadenylate synthetase 2(OAS2)	RG	Homo sapiens		OAS1	2'-5'-oligoadenylate synthetase 1(OAS1)	RG	Homo sapiens
								OASL	2'-5'-oligoadenylate synthetase like(OASL)	RG	Homo sapiens		OAS2	2'-5'-oligoadenylate synthetase 2(OAS2)	RG	Homo sapiens
								CXCL10	C-X-C motif chemokine ligand 10(CXCL10)	RG	Homo sapiens		OAS3	2'-5'-oligoadenylate synthetase 3(OAS3)	RG	Homo sapiens
								CXCL9	C-X-C motif chemokine ligand 9(CXCL9)	RG	Homo sapiens		OASL	2'-5'-oligoadenylate synthetase like(OASL)	RG	Homo sapiens
								CD86 molecule(CD86)	CD86 molecule(CD86)	RG	Homo sapiens		CXCL10	C-X-C motif chemokine ligand 10(CXCL10)	RG	Homo sapiens
								CD8A	CD8a molecule(CD8A)	RG	Homo sapiens		CXCL9	C-X-C motif chemokine ligand 9(CXCL9)	RG	Homo sapiens
								DnaJ heat shock protein family (Hsp40) member C3(DNAJC3)	DnaJ heat shock protein family (Hsp40) member C3(DNAJC3)	RG	Homo sapiens		CD8A	CD8a molecule(CD8A)	RG	Homo sapiens
								ISG15	ISG15 ubiquitin-like modifier(ISG15)	RG	Homo sapiens		DDX60	DExD/H-box helicase 60(DDX60)	RG	Homo sapiens
								SAM and HD domain containing deoxynucleoside triphosphate triphosphohydrolase 1(SAMHD1)	SAM and HD domain containing deoxynucleoside triphosphate triphosphohydrolase 1(SAMHD1)	RG	Homo sapiens		DHX58	DExH-box helicase 58(DHX58)	RG	Homo sapiens
								apolipoprotein B mRNA editing enzyme catalytic subunit 3G(APOBEC3G)	apolipoprotein B mRNA editing enzyme catalytic subunit 3G(APOBEC3G)	RG	Homo sapiens		HERC5	HECT and RLD domain containing E3 ubiquitin protein ligase 5(HERC5)	RG	Homo sapiens
								BST2	bone marrow stromal cell antigen 2(BST2)	RG	Homo sapiens		ISG15	ISG15 ubiquitin-like modifier(ISG15)	RG	Homo sapiens
								GBP1	guanylate binding protein 1(GBP1)	RG	Homo sapiens		MX1	MX dynamin like GTPase 1(MX1)	RG	Homo sapiens
								IFNG	interferon gamma(IFNG)	RG	Homo sapiens		NLRC5	NLR family CARD domain containing 5(NLRC5)	RG	Homo sapiens
								ISG20	interferon stimulated exonuclease gene 20(ISG20)	RG	Homo sapiens		BST2	bone marrow stromal cell antigen 2(BST2)	RG	Homo sapiens
								itchy E3 ubiquitin protein ligase(ITCH)	itchy E3 ubiquitin protein ligase(ITCH)	RG	Homo sapiens		EIF2AK2	eukaryotic translation initiation factor 2 alpha kinase 2(EIF2AK2)	RG	Homo sapiens
								mitochondrial antiviral signaling protein(MAVS)	mitochondrial antiviral signaling protein(MAVS)	RG	Homo sapiens		GBP1	guanylate binding protein 1(GBP1)	RG	Homo sapiens
								PTPRC	protein tyrosine phosphatase, receptor type C(PTPRC)	RG	Homo sapiens		IFI16	interferon gamma inducible protein 16(IFI16)	RG	Homo sapiens
								STAT1	signal transducer and activator of transcription 1(STAT1)	RG	Homo sapiens		IFNG	interferon gamma(IFNG)	RG	Homo sapiens
								toll like receptor 8(TLR8)	toll like receptor 8(TLR8)	RG	Homo sapiens		IFI44L	interferon induced protein 44 like(IFI44L)	RG	Homo sapiens
													IFIT1	interferon induced protein with tetratricopeptide repeats 1(IFIT1)	RG	Homo sapiens
													IFIT2	interferon induced protein with tetratricopeptide repeats 2(IFIT2)	RG	Homo sapiens
													IFIT3	interferon induced protein with tetratricopeptide repeats 3(IFIT3)	RG	Homo sapiens
													IFIT5	interferon induced protein with tetratricopeptide repeats 5(IFIT5)	RG	Homo sapiens
													IFITM1	interferon induced transmembrane protein 1(IFITM1)	RG	Homo sapiens
													IRF1	interferon regulatory factor 1(IRF1)	RG	Homo sapiens
													ISG20	interferon stimulated exonuclease gene 20(ISG20)	RG	Homo sapiens
													PLSCR1	phospholipid scramblase 1(PLSCR1)	RG	Homo sapiens
													PTPRC	protein tyrosine phosphatase, receptor type C(PTPRC)	RG	Homo sapiens
													RSAD2	radical S-adenosyl methionine domain containing 2(RSAD2)	RG	Homo sapiens
													STAT1	signal transducer and activator of transcription 1(STAT1)	RG	Homo sapiens
													TRIM22	tripartite motif containing 22(TRIM22)	RG	Homo sapiens
													TRIM5	tripartite motif containing 5(TRIM5)	RG	Homo sapiens

## Sheet: acute Versus IFNL in vitro
	29		73		156		6	9	2	59	82	12	6
	PT		wt vs k154e		unique ifnl		core	ifnl pt	154 and pt	ifnl and 154	ifnl	pt	k154e
	MX1		APOL1		IFI27		MX1	IFI27	IFI44	APOL1	ISG15	HLA-DPB1	CASP1
	IFI27		APOL3		MX1		IFIT1	LGALS3BP	IFI44L	APOL3	DDX60	CDKN1A	ETV7
	LGALS3BP		APOL6		OAS2		IFITM1	IFI6		APOL6	PARP9	BAZ2B	MX2
	HLA-DPB1		BATF2		ISG15		IFIT3	PSMB10		BATF2	HCP5	PSMA6	NAPSB
	CDKN1A		BST2		IFI6		TRIM22	OAS1		BST2	HERC6	RSAD2	SMTNL1
	IFI44		C15orf48		BST2		UBE2L6	HLA-A		C15orf48	PARP12	DYNLT1	XAF1
	IFIT1		CASP1		IFITM1			PSMB8		CD274	IRF9	HLA-DRB1
	IFI6		CD274		IFIT1			B2M		CMPK2	IFI35	HLA-DMA
	BAZ2B		CMPK2		CMPK2			OAS3		CYP2J2	DTX3L	BTN3A2
	PSMB10		CYP2J2		LAMP3					DDX58,TOPORS	HLA-F	HLA-G
	PSMA6		DDX58,TOPORS		OASL					DDX60L	PLSCR1	Sept.4
	RSAD2		DDX60L		TRIM22					DHX58	STAT1	UBD
	OAS1		DHX58		UBA7					EPSTI1	CFB
	IFITM1		EPSTI1		LGALS9					GBP1	HLA-B,HLA-C
	IFI44L		ETV7		IFIT3					GMPR	TAP1
	IFIT3		GBP1		IFI16					HELZ2	LAP3
	TRIM22		GMPR		MIR4458,MIR4458HG					HERC5	C19orf66
	DYNLT1		HELZ2		DDX60					HRASLS2	-
	UBE2L6		HERC5		DHX58					HSH2D	ANGPTL6
	HLA-DRB1		HRASLS2		PARP9					IDO1	TAP2
	HLA-DMA		HSH2D		HELZ2					IFI16	CCL5
	BTN3A2		IDO1		IFITM3					IFIH1	TRIM21
	HLA-A		IFI16		IFIH1					IFIT2	SP100
	HLA-G		IFI44		SAMD9L					IFITM3	TRIM14
	PSMB8		IFI44L		BATF2					LAMP3	IFITM2
	Sept.4		IFIH1		HCP5					LGALS9	EIF2AK2
	B2M		IFIT1		OAS3					LMO2	IFIT5
	OAS3		IFIT2		HERC6					MIR4458,MIR4458HG	TAPBPL
	UBD		IFIT3		PARP12					NLRC5	PSME2
			IFITM1		IRF9					NMI	PML
			IFITM3		IFI35					NT5C3A	C1R
			LAMP3		PSMB9					OAS2	MAPK8IP2
			LGALS9		RARRES3					OASL	TRIM25
			LMO2		DTX3L					PARP14	FLT3LG
			MIR4458,MIR4458HG		PLEKHA4					PIK3AP1	TNFRSF10D
			MX1		OAS1					PLEKHA4	PLA1A
			MX2		SAMD9					PPM1K	LOC101929723
			NAPSB		SP110					PSMB9	NANS
			NLRC5		HLA-F					RARRES3	PNPT1
			NMI		HERC5					RASGRP3	ZNFX1
			NT5C3A		LGALS3BP					RMRP	SELL
			OAS2		IFIT2					RN7SL1	ADGRE1
			OASL		UBE2L6					RN7SL2	TDRD7
			PARP14		TRANK1					RPPH1	C5orf56
			PIK3AP1		NLRC5					SAMD9	RNF213
			PLEKHA4		PSMB8					SAMD9L	MT2A
			PPM1K		PLSCR1					SAMHD1	ISG20
			PSMB9		HSH2D					SERPING1	HLA-E
			RARRES3		STAT1					SP110	PHF11,SETDB2
			RASGRP3		APOL6					SP140L	HDX
			RMRP		SP140L					STAT2	RN7SK
			RN7SL1		GBP1					THEMIS2	ADAR
			RN7SL2		PARP14					TLR3	MAP2
			RPPH1		CFB					TMEM229B	TMEM173
			SAMD9		HLA-B,HLA-C					TNFSF10	IRF1
			SAMD9L		SAMHD1					TNFSF13B	MYD88
			SAMHD1		USP18					TRANK1	CEACAM1
			SERPING1		TAP1					UBA7	MDK
			SMTNL1		LAP3					USP18	ATRIP,TREX1
			SP110		DDX60L						LOC100419583
			SP140L		SERPING1						BTN3A3
			STAT2		RN7SL1						CMTR1
			THEMIS2		RN7SL2						ZMYND15
			TLR3		B2M						OGFR
			TMEM229B		C19orf66						CDK18
			TNFSF10		-						C1S
			TNFSF13B		APOL1						TRIM38
			TRANK1		ANGPTL6						TRIM5
			TRIM22		STAT2						PSME1
			UBA7		TAP2						ACY3
			UBE2L6		TLR3						PCK1
			USP18		CCL5						LY6E
			XAF1		TRIM21						ODF3B,SCO2,TYMP
					SP100						BTN3A1
					TRIM14						APOL2
					IFITM2						PCAT6
					EIF2AK2						DANCR
					IFIT5						TMEM258
					DDX58,TOPORS						HES4
					TAPBPL						GIP
					PIK3AP1						LINC00641
					PSME2						GNG2
					PML
					C1R
					MAPK8IP2
					TRIM25
					FLT3LG
					TNFRSF10D
					C15orf48
					APOL3
					EPSTI1
					GMPR
					TNFSF13B
					TNFSF10
					CYP2J2
					RASGRP3
					THEMIS2
					LMO2
					HRASLS2
					PPM1K
					RPPH1
					PLA1A
					LOC101929723
					NANS
					IDO1
					RMRP
					CD274
					PNPT1
					ZNFX1
					SELL
					ADGRE1
					NMI
					TDRD7
					C5orf56
					RNF213
					TMEM229B
					MT2A
					ISG20
					HLA-E
					PHF11,SETDB2
					HDX
					RN7SK
					ADAR
					MAP2
					TMEM173
					IRF1
					MYD88
					CEACAM1
					MDK
					ATRIP,TREX1
					LOC100419583
					BTN3A3
					CMTR1
					ZMYND15
					OGFR
					CDK18
					C1S
					TRIM38
					TRIM5
					PSME1
					NT5C3A
					ACY3
					PCK1
					LY6E
					HLA-A
					PSMB10
					ODF3B,SCO2,TYMP
					BTN3A1
					APOL2
					PCAT6
					DANCR
					TMEM258
					HES4
					GIP
					LINC00641
					GNG2

## Sheet: Human values for chimp biased g
ID	Group	MX1	IFI27	LGALS3BP	HLA-DPB1	CDKN1A	IFI44	IFIT1	IFI6	BAZ2B	PSMB10	PSMA6	RSAD2	OAS1	IFITM1	IFI44L	IFIT3	TRIM22	DYNLT1	UBE2L6	HLA-DRB1	HLA-DMA	BTN3A2	HLA-A	HLA-G	PSMB8	2004-09-01	TNFRSF1A	TMSB10	TNFSF10	B2M	OAS3	UBD	CXCL10	CXCL11	AKR1B10	CCL20	HKDC1
GSM945910	AHC	8.77047	8.32716	8.35696	5.12537	7.18667	4.71501	9.58591	8.51037	7.48293	8.9562	11.4756	6.81607	7.78319	10.9093	7.71126	8.56941	9.36229	10.5314	10.2941	6.51887	8.63766	6.9982	12.6174	9.79454	9.63829	4.33598	9.12111	11.6048	11.2564	5.04409	7.42162	9.18546	10.2992	4.83699	8.7477	6.575	3.62738
GSM945911	AHC	9.54912	9.53159	8.95215	5.02074	7.57199	4.05612	10.2064	9.25342	7.20514	9.22748	11.5425	7.89395	8.36976	10.953	8.11561	9.15505	10.0398	10.9645	10.835	5.24376	9.58309	7.71627	12.7955	10.2693	10.2191	3.99479	9.14774	11.8697	11.1579	5.30492	8.00021	9.7898	10.7314	4.99634	10.3489	6.33075	4.7007
GSM945912	AHC	7.84486	8.1764	8.5275	6.05862	7.49363	4.68063	8.8455	7.49979	7.48588	8.83268	11.3523	5.56701	7.31254	10.326	6.26826	8.03213	9.32149	10.4157	9.93104	7.61988	8.82624	7.62434	12.6912	9.95186	9.73503	4.30405	8.78068	11.4297	11.0394	5.01925	6.91923	10.1305	11.3721	5.34446	6.7146	6.02039	3.19122
GSM945913	AHC	7.86126	8.67624	8.27148	5.16739	7.54568	4.0184	8.80755	8.26715	7.34839	9.13589	11.4558	5.89615	7.87205	10.067	6.58447	7.82334	9.4261	10.5967	10.1685	6.60038	8.911	7.71954	12.822	10.2105	10.0283	4.27156	8.85362	11.3883	11.162	5.47678	7.07286	9.53558	10.5272	5.00534	8.20521	4.99444	3.42585
GSM945914	AHC	8.449	7.82524	8.49116	5.28141	8.31614	3.99594	9.09309	8.77098	7.31792	8.71002	11.4609	5.37571	7.32103	10.4518	5.99156	8.15069	9.356	10.5936	9.90536	4.7808	9.05148	7.14571	12.6331	9.79146	9.59609	4.18006	9.40648	11.5036	10.6333	5.34298	7.12154	11.1452	11.5637	5.62306	10.2462	8.92656	4.1309
GSM945915	AHC	9.22498	10.0332	9.0742	5.51181	8.61262	4.68257	9.95714	10.4592	7.08672	8.83222	11.5836	6.79531	8.55486	10.6239	7.20037	8.69007	10.0901	10.9163	10.2922	6.97585	9.2894	7.89384	13.0314	10.4056	9.9951	4.06915	8.73461	11.4787	10.8252	5.75936	8.06338	10.3942	11.9935	5.51869	8.45768	5.87043	3.74361
GSM945916	HV	7.89507	8.56748	8.76411	4.60473	7.47318	4.2771	8.59906	8.99117	7.49566	8.57209	10.9218	5.67544	7.19042	10.5418	6.17825	7.31465	8.57908	10.1128	9.76519	8.03721	8.122	7.32654	12.3873	9.32307	9.428	3.98346	9.24128	11.1293	10.3492	5.10367	7.00549	8.61988	7.01062	2.57738	5.28427	4.89203	3.18246
GSM945917	HV	7.02158	8.38199	7.84502	5.09169	8.03899	4.16454	9.14914	6.83552	7.27198	8.49516	11.0469	5.53484	7.11869	9.9666	5.40757	7.538	8.6317	9.92217	8.97241	6.60224	7.1952	6.62566	11.8969	9.15924	8.84606	4.3474	8.82715	10.5344	10.869	4.66606	6.15927	7.17142	6.63123	2.76127	7.35068	3.76456	3.1236
GSM281881	HV	7.50341	10.5194	10.1335	4.70581	8.57264	5.72951	10.5263	10.1098	8.17439	9.92953	12.742	6.85897	9.4947	12.2174	8.2848	8.49561	10.3101	11.7976	11.1485	6.76929	9.93705	7.44349	13.237	11.6934	10.3324	3.76507	10.7149	12.9252	12.4055	4.83424	6.9812	9.75255	8.03008	4.263	6.88182	3.6833	4.16828
GSM281882	HV	8.39212	10.0891	9.70633	4.83763	7.77805	5.0781	10.6958	10.5294	8.42754	9.79178	12.7064	7.50923	8.20317	11.6411	7.81141	8.99968	10.4965	11.7218	11.8264	6.97708	9.9056	8.37228	13.4718	11.4105	10.5671	3.73775	10.6724	12.9362	12.5743	4.56409	7.59182	8.26752	9.44445	5.41681	3.56526	3.6563	4.08385
	fold change on healthy controls 1 and 2					healthy controls 1 and 2 were reported in the same study. Healthy controls 3 and 4 appear be outliers and would potentially underestimate gene induction
	B2M	1.10397	1.32274	1.08512	1.49008	1.35809	1.81248
	BAZ2B	1.0679	0.880865	1.07009	0.972822	0.952491	0.811447
	BTN3A2	0.986199	1.62227	1.52212	1.62596	1.09237	1.83475
	CDKN1A	0.661141	0.86355	0.817897	0.847939	1.44643	1.77642
	DYNLT1	1.42478	1.92366	1.31504	1.49082	1.48756	1.86049
	HLA-A	1.3704	1.55045	1.44233	1.57919	1.38539	1.82583
	HLA-DMA	1.87369	3.60828	2.13534	2.26455	2.49615	2.94368
	HLA-DPB1	1.19475	1.11117	2.28146	1.23006	1.33122	1.56174
	HLA-DRB1	0.509671	0.210593	1.09327	0.539296	0.152785	0.69961
	HLA-G	1.46516	2.03616	1.63396	1.95481	1.46204	2.23792
	IFI27	0.900905	2.0761	0.811514	1.14753	0.63619	2.93932
	IFI44	1.40746	0.891436	1.37431	0.86843	0.855018	1.37616
	IFI44L	3.64897	4.82937	1.34209	1.67098	1.10787	2.5608
	IFI6	1.17047	1.95903	0.580958	0.988874	1.4022	4.5186
	IFIT1	1.60854	2.47305	0.962823	0.937826	1.14308	2.08057
	IFIT3	2.20193	3.30445	1.51728	1.31285	1.64724	2.394
	IFITM1	1.54402	1.59149	1.03049	0.861143	1.12441	1.26688
	LGALS3BP	0.986512	1.49029	1.1103	0.929758	1.08268	1.62186
	MX1	2.37351	4.07181	1.24956	1.26384	1.89941	3.25247
	OAS1	1.54562	2.32102	1.11539	1.64381	1.12196	2.63876
	OAS3	1.71482	2.5609	1.21056	1.34658	1.3928	2.67553
	PSMA6	1.40432	1.47105	1.28934	1.38524	1.39015	1.51348
	PSMB10	1.33985	1.61702	1.2299	1.51756	1.12966	1.22951
	PSMB8	1.38714	2.07471	1.48335	1.81769	1.34716	1.77636
	RSAD2	2.31213	4.88072	0.972761	1.22205	0.851961	2.2791
	SEPT.4	1.1166	0.88143	1.09215	1.06783	1.00222	0.928053
	TRIM22	1.68957	2.7022	1.64246	1.76598	1.68222	2.79812
	UBD	2.16623	3.29328	4.17065	2.76122	8.42665	5.00686
	UBE2L6	1.82954	2.66188	1.42252	1.67705	1.39743	1.82721
	Mean chimpanzee fold change over time
		8	9	10	11	12	13	14	15	16	17	18			B2M	BAZ2B	BTN3A2	CDKN1A	DYNLT1	HLA-A	HLA-DMA	HLA-DPB1	HLA-DRB1	HLA-G	IFI27	IFI44	IFI44L	IFI6	IFIT1	IFIT3	IFITM1	LGALS3BP	MX1	OAS1	OAS3	PSMA6	PSMB10	PSMB8	RSAD2	SEPT.4	TMSB10	TNFRSF1A	TNFSF10	TRIM22	UBD	UBE2L6
	B2M	2.73314		2.3		1.29981	1.4	2.05623							1.10397	1.0679	0.986199	0.661141	1.42478	1.3704	1.87369	1.19475	0.509671	1.46516	0.900905	1.40746	3.64897	1.17047	1.60854	2.20193	1.54402	0.986512	2.37351	1.54562	1.71482	1.40432	1.33985	1.38714	2.31213	1.1166	1.67313	1.05124	1.54121	1.68957	2.16623	1.82954
	BAZ2B	1.1551	1.40641	0.85	1.85391	1.7	3	1.38179	1.10198	1.23426		0.62207			1.32274	0.880865	1.62227	0.86355	1.92366	1.55045	3.60828	1.11117	0.210593	2.03616	2.0761	0.891436	4.82937	1.95903	2.47305	3.30445	1.59149	1.49029	4.07181	2.32102	2.5609	1.47105	1.61702	2.07471	4.88072	0.88143	2.01033	1.07082	1.43946	2.7022	3.29328	2.66188
	BTN3A2	1.63823	1.395		2.5328	2.05623		1.68974	1.30555	1.86074	2.18859	1.54748			1.08512	1.07009	1.52212	0.817897	1.31504	1.44233	2.13534	2.28146	1.09327	1.63396	0.811514	1.37431	1.34209	0.580958	0.962823	1.51728	1.03049	1.1103	1.24956	1.11539	1.21056	1.28934	1.2299	1.48335	0.972761	1.09215	1.4819	0.830275	1.32592	1.64246	4.17065	1.42252
	CDKN1A	3.90488	4.06157		10.269	1		1.98385	1.95464	2.71201	1	1.79915			1.49008	0.972822	1.62596	0.847939	1.49082	1.57919	2.26455	1.23006	0.539296	1.95481	1.14753	0.86843	1.67098	0.988874	0.937826	1.31285	0.861143	0.929758	1.26384	1.64381	1.34658	1.38524	1.51756	1.81769	1.22205	1.06783	1.43994	0.873326	1.44355	1.76598	2.76122	1.67705
	DYNLT1	2.97278	2.01473		3.42864	2.25012		1.21092	1.75736	1.63302		1.30345			1.35809	0.952491	1.09237	1.44643	1.48756	1.38539	2.49615	1.33122	0.152785	1.46204	0.63619	0.855018	1.10787	1.4022	1.14308	1.64724	1.12441	1.08268	1.89941	1.12196	1.3928	1.39015	1.12966	1.34716	0.851961	1.00222	1.55975	1.28116	1.0006	1.68222	8.42665	1.39743
	HLA-A	1.93006	1.53558		2.88316	2.39496		1.68363	1.58459	1.69076	2.11404	1.10929			1.81248	0.811447	1.83475	1.77642	1.86049	1.82583	2.94368	1.56174	0.69961	2.23792	2.93932	1.37616	2.5608	4.5186	2.08057	2.394	1.26688	1.62186	3.25247	2.63876	2.67553	1.51348	1.22951	1.77636	2.2791	0.928053	1.53309	0.80418	1.143	2.79812	5.00686	1.82721
	HLA-DMA	1.32192	16.3488		3.19745	2.05623		12.0138	59.8543	147.482	2.23457	57.1185		MEAN	1.36208	0.959269	1.44728	1.0689	1.58372	1.5256	2.55361	1.45173	0.534204	1.79834	1.41859	1.1288	2.52668	1.77002	1.53432	2.06296	1.2364	1.20357	2.35177	1.73109	1.81686	1.40893	1.34392	1.64774	2.08645	1.01471	1.61636	0.985168	1.31562	2.04676	4.30415	1.80261
	HLA-DPB1	2.29503	0.721167		5.17081	2.62079		2.02036	1.47512	2.13455	2.65737	1.55399
	HLA-DRB1	1.7086	1.06041		2.94129	3.31728		2.58501	2.64034	5.80318	3.605	2.97853
	HLA-G	2.38772	1.35662		3.23197	2.8481		2.14656	1.20352	2.07388	2.14355	1.78293
	IFI27	9.07443		4.05		3.54461	0.6	7.37657			3.97237
	IFI44	7.69584	6.37203		7.20972	7.46426		2.4336	1.58429	2.737	1	1.89481
	IFI44L	6.3246	4.43408		4.58028	4.89056		1.40712	1.38293	3.4124	1	2.01052
	IFI6	5.40908	11.0525	2.35	5.90054	2.73009	0.7	2.58574	1.73724	4.48215	1	2.09017
	IFIT1	10.7533	8.84446	3.75	11.1972	2.8205	0.6	2.68662	1.69155	3.66157	1	2.78579
	IFIT3	6.81224	5.05544		3.9476	5.31474		2.16049	2.40271	6.00318	1	3.13675
	IFITM1	1.7499	1.99485		1.97891	2.92817		1.21965	0.934616	1.48601	1	1.24056
	LGALS3BP	5.86338	2.50277		4.73274	2.2974		1.83117	1.10506	2.02727	1	1.47219
	MX1	5.75413	5.70843	1.4	5.90926	2.62632	0.5	3.04845	1.12762	3.51185	1	2.62926
	OAS1	4.76096	3.92614		5.97386	3.63008		1.64032	0.964345	2.26117	1	2.17336
	OAS3	3.31278		1.55		1.54403	1.4	1			1
	PSMA6	2.37172	2.02694		2.04351			1.79555	1.45783	1.8112		1.15019
	PSMB10	2.24023	1.09868		0.935405			1.25793	1.51703	1.69499		1.26245
	PSMB8	1.44038	1.30494		1.76924	2.09943		1.66211	1.37143	1.59237	1	1.53048
	RSAD2	429.688	135		171	5.54044		39	-39	32	1	51
	SEPT.4	0.700352	0.348702		0.19616	0.460094		1.10874	0.535443	0.722211	1	0.760813
	TRIM22	6.89191	11.8077		16.3016	4.99332		3.06084	2.93605	8.373	1	2.16369
	UBD	3.76298		2.3		4.17056	3.3	6.86852			3.27161
	UBE2L6	4.40795	3.35497		3.43081	4.62675		2.0981	2.25237	4.03701	1	2.09989

## Sheet: Chronic
											human					chimpanzee from Bigger et al., 2004
	hs up updated	pt up updated			shared up	hs u u	pt u u				fc	fc	fc	fc									gt3
	C16orf54	IFI27			LYZ	C16orf54	DKK4		RATIO		low	high	gt1	gt3	average HS	avergae PT	X0497	X0498	X0500	X0501	X0081	X0123	X0119	X0130	X0183	X0304
	CD96	IFI44L			STAT1	CD96	RBP4		7.10185	LGALS3BP	1	2.04952	2.94021	1	1.74743	12.41	17.1	19.4	16.4	10.9	13.1	7	5.6	7.6	10.1	16.9
	FXYD3	MDK			CXCL10	FXYD3	CXCL11		5.86412	MDK	1	3.2217	7.59779	7.06823	4.72193	27.69	48.2	44.9	48.2	32.2	14.7	21.7	4.9	17.1	22.8	22.2
	FCRLA	ISG15			UBD	FCRLA	ALB		4.99329	ifi44l	1	9.11263	10.9351	5.13936	6.54678	32.69	40.5	35.5	21	32.4	47.5	30.1	18.3	20.5	35.8	45.3
	STK17B	ISG20			OASL	STK17B	ENO3		3.98869	IFIT1	1	5.03665	8.56409	3.48039	4.52028	18.03	15.5	13.9	16.1	13	22.6	20	10.1	15.9	25.5	27.7
	SLAMF7	DKK4			PSMB9	SLAMF7	KIAA0924		3.88711	ISG20	1	3.21125	3.56992	3.22959	2.75269	10.7	15.1	9.5	4.8	5.9	10.75	4.9	1	7.35	9.6	38.1
	MAL	IFIT1			SLC15A3	MAL	TSPAN8		3.6447	DDX58	1	3.36498	3.19415	2.16457	2.43092	8.86	9.3	7.8	5.7	4.9	12.6	9.6	1	4.4	11.4	21.9
	OSBPL3	RBP4			LGALS3BP	OSBPL3	IGHG3		2.97831	herc6	1	5.59456	9.05127	4.24463	4.97262	14.81	19.7	17	16.3	8.2	18	16.1	5.1	12.4	14.3	21
	GZMK	CXCL10			PLSCR1	GZMK	C6orf62		2.97783	SAMD9	1	5.80855	3.65936	2.66917	3.28427	9.78	7.3	7.1	9.1	3.3	14.4	14.7	1	9.4	10.7	20.8
	CXCL13	CXCL11			IFI35	CXCL13	IRF7		2.97214	USP18	1	3.42517	3.30929	1	2.18361	6.49	7.5	6.4	6.2	5.2	8	6.7	2.9	4.8	6.1	11.1
	LYZ	HERC6			TAP1	TBC1D10C	CYP2C9		2.88572	IFIT5	1	2.84275	2.12951	1	1.74306	5.03	5.6	4.5	5.6	2.6	5.1	5.7	1	5	5.8	9.4
	TBC1D10C	IFI6			IFITM1	BIRC3	IGLJ3		2.70975	IFI27	1	11.9686	67.5531	17.5686	24.5226	66.45	49.5	54.6	59.3	55.7	79.9	76.1	71.5	66.3	81.6	70
	BIRC3	ALB			TDRD7	CD22	GPNMB		2.61221	OAS1	1	3.83578	6.35222	3.00686	3.54872	9.27	10.6	8.75	9.4	7.45	9.8	9.75	3.7	6.9	10.9	15.45
	CD22	LGALS3BP			SP110	ACAP1	RNP24		2.54899	TRIM22	1	3.69404	2.24622	2.06722	2.25187	5.74	4.3	6.6	6.5	4.8	6	6.4	3.4	5.5	6.9	7
	ACAP1	MX1			PARP12	JAK3	HIST1H2BH		2.54519	ifih1	1	3.47736	3.37859	2.37512	2.55777	6.51	8.9	5.7	5	3.9	6.5	7.2	1	4.7	7.5	14.7
	JAK3	ENO3			IFI16	CCL21	AREG		2.4749	IFIT3	1	5.33275	6.3202	3.73557	4.09713	10.14	14.8	10.6	9.5	6.5	9.3	9.6	2.7	7	9.8	21.6
	CCL21	IFI44			IFIT5	PDGFD	ADAMDEC1		2.39494	ISG15	1	8.83114	23.6161	9.07571	10.6307	25.46	21.4	20.4	20.8	22.6	31.8	27.5	17	20.7	34.1	38.3
	PDGFD	OAS1			HLA-F	LCK	ALDOB		2.28988	IFI16	1	2.73117	2.32598	1	1.76429	4.04	4.3	3.1	2.4	2.6	4.3	5.2	1	4.3	5.7	7.5
	LCK	SAMD9			GBP1	GBP5	UBE2L6		2.16418	IFIT2	1	4.865	5.82016	3.54459	3.80744	8.24	11.4	13	9.8	6.6	7.1	7.5	1	4.6	6.1	15.3
	STAT1	OAS2			ISG20	CLEC2D	PLIN2		2.13686	RTP4	1	3.39848	4.78557	3.20797	3.098	6.62	8.2	5.6	5.4	5.7	6.8	6.9	1	8	7.1	11.5
	GBP5	IFIT3			MDK	MAP4K1	TXN		1.98213	IFI35	1	2.19419	2.81199	2.22738	2.05839	4.08	5.6	4.3	3.9	3	5	3.7	1	2.9	4.6	6.8
	CLEC2D	UBD			APOL3	CD69	HIST2H2AA3		1.90383	PARP12	1	2.6892	2.85348	1	1.88567	3.59	5.3	3.8	3.4	2.7	3.5	3.5	1	2.9	3.6	6.2
	MAP4K1	DDX58			DDX58	SLC44A4	GDF15		1.73637	UBD	3.33643	6.85361	4.88125	7.91917	5.74762	9.98	5.2	6.6	8.1	5.8	10.9	12.2	2.7	7.9	16	24.4
	CD69	OAS3			RTP4	RHOH	IGL@		1.70742	CXCL10	3.14481	6.35998	10.512	20.5826	10.1498	17.33	17.8	11.8	13.3	8.3	13.5	17.3	2.1	13.1	30.5	45.6
	SLC44A4	RSAD2			USP18	TMC4	sept.6		1.70142	SLC15A3	1	2.04423	3.24944	2.78111	2.26869	3.86	6.5	6.1	3.9	3.6	3	2.9	1	2.7	3.3	5.6
	RHOH	IFIT2			IFI6	ITM2A	SLC1A1		1.63619	MX1	1	8.08084	12.8197	6.26251	7.04076	11.52	14.5	12.6	9.4	7.9	12.6	12.3	6.4	10.5	11.2	17.8
	TMC4	STAT1			TRIM22	ITGA3	LEPR		1.62397	OAS3	1	7.20585	9.5649	4.93907	5.67746	9.22	13.7	9.6	8.2	4.5	6.8	7.6	2.5	5.9	12	21.4
	ITM2A	CXCL11			OAS1	PLA2G2D	CD74		1.56152	OAS2	1	8.39287	11.9954	5.84167	6.80749	10.63	12.7	12.9	12.9	8.3	11.1	11.2	4.6	8.3	10.6	13.7
	ITGA3	KIAA0924			HERC5	SLAMF1	CD38		1.55536	LYZ	2.07274	2.12131	2.21401	2.25873	2.1667	3.37	1	1	1	1	7.2	2.6	1	7.3	8.8	2.8
	PLA2G2D	OAS1			IFIT2	NRARP	TRIM38		1.5511	PLSCR1	1	2.18512	2.29905	2.04598	1.88254	2.92	2.95	2.6	2.15	2.3	2.9	3.05	1	2.15	3.25	6.85
	SLAMF1	TSPAN8			IFIT1	LAMP3	PLA1A		1.48206	TDRD7	1	2.51146	2.53278	1	1.76106	2.61	3.4	2.7	2.5	2.2	2.4	2.5	1	2	2.8	4.6
	NRARP	RTP4			IFIT3	SPOCK2	IGFBP1		1.41626	GBP1	1	3.12663	2.66479	4.36475	2.78904	3.95	7.1	5.8	4.4	3.7	2.7	2.5	1	1	5.2	6.1
	LAMP3	IFIH1			SAMD9	CD8A	CAPN2		1.40079	ddx60	1	6.4222	6.51999	4.24761	4.54745	6.37	5.8	4.9	5.1	4.4	6.5	5.6	4.3	5.4	11.2	10.5
	SPOCK2	USP18			OAS3	CLIC6	DHX58		1.393	PSMB9	1	2.02641	4.01183	4.73492	2.94329	4.1	6.5	4.6	4.6	4.3	2.6	4.1	1	2.6	2.8	7.9
	CD8A	IGHG3			MX1	PI16	HAL		1.37476	STAT1	2.11799	6.24607	5.23199	5.86914	4.8663	6.69	8.35	6	5.6	4.6	8.7	6.4	2.7	5.15	8.7	10.7
	CLIC6	DDX60			OAS2	ATP2A3	HLA-DRB3		1.35367	IFI6	1	3.67758	23.6504	9.96797	9.57398	12.96	10.3	8.6	12.4	11.6	15.5	11.5	14.4	14	13.5	17.8
	PI16	C6orf62			ISG15	DGKA	FLJ38348		1.30374	TAP1	1	2.30672	3.09063	3.574	2.49284	3.25	3.2	4.1	3.8	2.7	1	3.2	1	2.7	4.1	6.7
	ATP2A3	IRF7			RSAD2	APOBEC3D	HLA-DRA		1.2749	APOL3	1	3.35567	3.3792	3.93665	2.91788	3.72	3.8	3.2	3.2	2.7	2.8	4.4	2	4.4	2.5	8.2
	DGKA	TRIM22			IFI27	CD3E	NMI		1.26841	SP110	1	2.67413	2.09024	1	1.69109	2.145	3	2.4	2.15	1	2.2	2.4	1	2.1	2.3	2.9
	APOBEC3D	LYZ			IFI44	PAPLN	FMR1		1.1825	ifi44	1	7.02702	10.9351	5.13936	6.02538	7.125	7.45	6.75	7.4	6.6	7.65	6.95	4.55	6.25	8.55	9.1
	CD3E	CYP2C9			IFI44L	CD2	HLA-B		1.1149	HERC5	1	4.48989	9.7562	4.12782	4.84348	5.4	7.4	5.5	4.9	4.4	4.2	5.1	2.4	3.2	5	11.9
	PAPLN	OASL			HERC6	LTB	SP100		0.871606	RSAD2	1	10.868	19.8905	6.33208	9.52265	8.3	11.1	10.9	7.7	5.3	9.4	7.6	1	5.2	7.9	16.9
	CD2	IFIT5			IFIH1	CD3G	IFI30		0.770262	HLA-F	1	2.84343	4.07684	5.06232	3.24565	2.5	2.2	2.5	2.7	2.5	2.3	3	2.5	2.2	2.5	2.6
	LTB	HERC5			DDX60	KRT7	HLA-C		0.720985	IFITM1	1	2.50466	6.65994	3.78853	3.48828	2.515	2.3	2.4	2.4	2.35	2.75	3.05	2.3	2.25	2.5	2.85
	CD3G	IGLJ3				APOD	DYNLT1		0.372882	OASL	4.18936	7.39134	31.2993	13.3308	14.0527	5.24	6.15	5.9	5.55	3.95	5.15	4.15	2.7	2.7	4.4	11.75
	KRT7	ISG20				RASGRP1	RARRES3
	APOD	GPNMB				FBLN1	CTSS
	RASGRP1	RNP24				MZB1	CNP
	FBLN1	HIST1H2BH				SMOC2	FMO5
	MZB1	AREG				SPATA21	BST2
	SMOC2	OASL				KRT19	HIST1H2BC
	SPATA21	GBP1				TESC	ADAR
	KRT19	PSMB9				CD3D	BTN3A3
	TESC	IFI35				APCDD1	HLA-G
	CD3D	ADAMDEC1				PDZD3	TRIM14
	APCDD1	IFI16				PARM1	IFITM3
	PDZD3	STAT1				CFTR
	PARM1	IGLJ3				ASB2
	CFTR	SLC15A3				SPINT1
	ASB2	ALDOB				B3GNT7
	SPINT1	IFI16				SIT1
	B3GNT7	ALDOB				TIGIT
	SIT1	UBE2L6				IDO1
	TIGIT	PLIN2				BICC1
	IDO1	GBP1				UBASH3A
	BICC1	TXN				ITK
	UBASH3A	PARP12				SLC5A1
	ITK	TAP1				CXCL9
	SLC5A1	APOL3				LGALS2
	CXCL9	HIST2H2AA3				HAPLN3
	LGALS2	GDF15				CHST4
	HAPLN3	IGL@				F13A1
	CHST4	2017-09-06				SIRPG
	F13A1	SLC1A1				ADAM28
	SIRPG	IFI44				GRAMD1B
	ADAM28	LEPR				CD6
	GRAMD1B	CD74				ICOS
	CD6	PLSCR1				FAM129C
	ICOS	CYP2C9				CD24
	FAM129C	CD38				POU2AF1
	CD24	TRIM38				GPR174
	POU2AF1	LEPR				FCRL3
	GPR174	PLSCR1				SPP1
	FCRL3	PLA1A				PTPN7
	SPP1	LEPR				CR2
	PTPN7	IGFBP1				PAQR5
	CR2	CAPN2				MUC1
	PAQR5	DHX58				CASR
	CXCL10	HAL				MCOLN2
	MUC1	HLA-DRB3				MIAT
	CASR	HLA-DRB3				KLF5
	MCOLN2	HLA-DRB3				EHF
	MIAT	FLJ38348				ST6GALNAC1
	KLF5	HLA-DRA				B3GNT3
	EHF	NMI				CD5
	ST6GALNAC1	FMR1				PROM2
	B3GNT3	HIST2H2AA3				CCL19
	UBD	HLA-B				KCNJ16
	CD5	TDRD7				SPIB
	PROM2	IFITM1				KCNN4
	CCL19	SP100				CD79A
	KCNJ16	IFI30				FCRL5
	SPIB	HLA-C				MMP9
	KCNN4	DYNLT1				SLC6A19
	CD79A	RARRES3				MUC6
	FCRL5	CTSS				MS4A1
	OASL	HLA-B				FAM129A
	MMP9	CNP				E2F1
	SLC6A19	FMO5				MARVELD3
	MUC6	BST2				TOP2A
	MS4A1	HIST1H2BC				HLA-A
	FAM129A	SP110				ITGA4
	E2F1	HLA-DRB3				CDK1
	MARVELD3	HLA-F				CCL5
	TOP2A	ADAR				HLA-DQB1
	PSMB9	BTN3A3				HLA-DQA1
	HLA-A	C6orf62				RRM2
	ITGA4	SP110				CENPU
	SLC15A3	HLA-G				CASC5
	CDK1	HLA-G				CCR5
	LGALS3BP	TRIM14				EMB
	CCL5	HLA-B				APOBEC3G
	HLA-DQB1	IFITM1				GVINP1
	HLA-DQA1	BTN3A3				RGS9
	RRM2	HLA-G				SLAMF8
	CENPU	HLA-F				CD83
	CASC5	IFITM3				FCER1A
	CCR5					CXCR4
	EMB					TAP2
	APOBEC3G					TFF3
	GVINP1					GBP4
	RGS9					CCR2
	SLAMF8					UPP2
	PLSCR1					VTCN1
	IFI35					PATL2
	CD83					SEL1L3
	FCER1A					PARP14
	CXCR4					PARP9
	TAP2					GAPT
	TFF3					BATF2
	GBP4					XAF1
	TAP1					IKBKE
	CCR2					HCP5
	UPP2					EIF2AK2
	VTCN1					HCG4
	PATL2					SLFN5
	SEL1L3					MX2
	PARP14					DDX60L
	IFITM1					ACHE
	TDRD7					HELZ2
	PARP9					ZNFX1
	GAPT					GBP1P1
	BATF2					TRIM69
	SP110					CCL20
	XAF1					SAMD9L
	IKBKE					ZBP1
	PARP12					EPSTI1
	IFI16					ETV7
	HCP5					CMPK2
	EIF2AK2
	HCG4
	SLFN5
	MX2
	IFIT5
	HLA-F
	DDX60L
	ACHE
	GBP1
	HELZ2
	ZNFX1
	ISG20
	MDK
	GBP1P1
	TRIM69
	APOL3
	DDX58
	RTP4
	USP18
	IFIH1
	IFI6
	TRIM22
	OAS1
	CCL20
	SAMD9L
	HERC5
	ZBP1
	IFIT2
	IFIT1
	IFIT3
	HERC6
	SAMD9
	DDX60
	EPSTI1
	ETV7
	OAS3
	CMPK2
	MX1
	OAS2
	ISG15
	RSAD2
	IFI27
	IFI44
	IFI44L
